# Supplementary material
Source: ML conference proceedings conference paper supplement (https://proceedings.neurips.cc/paper_files/paper/2016/hash/43fa7f58b7eac7ac872209342e62e8f1-Abstract.html)
Supplement: Supplementary file [file 43fa7f58b7eac7ac872209342e62e8f1-Supplemental.zip]

## Model parameters

| Symbol                                                                                            | Description                    | Value                                                                                                         |
|---------------------------------------------------------------------------------------------------|--------------------------------|---------------------------------------------------------------------------------------------------------------|
| $\mathbf{x}_b = [x_b, y_b, z_b]^T$                                                                | Coordinates of the ball        | —                                                                                                             |
| $\dot{\mathbf{x}}_b = [\dot{x}_b, \dot{y}_b, \dot{z}_b]^T$                                        | Velocity of the ball           | —                                                                                                             |
| $\mathbf{x}_c = [x_c, y_c]^T$                                                                     | Coordinates of the catcher     | —                                                                                                             |
| $\dot{\mathbf{x}}_c = [\dot{x}_c, \dot{y}_c]^T$                                                   | Velocity of the catcher        | —                                                                                                             |
| $\{\phi, \psi\}$                                                                                  | Spherical angles defining gaze | —                                                                                                             |
| $\mathbf{x} = [\mathbf{x}_b, \dot{\mathbf{x}}_b, \mathbf{x}_c, \dot{\mathbf{x}}_c, \phi, \psi]^T$ | State of the system            | —                                                                                                             |
| $\mathbf{z} = [\mathbf{x}_b, \mathbf{x}_c, \phi, \psi]^T$                                         | Observations                   | —                                                                                                             |
| $\mathbf{u} = [F, \dot{\phi}, \dot{\psi}, \theta]^T$                                              | Controls                       | $-2\pi \leq \dot{\phi}, \dot{\psi} \leq 2\pi,  \theta  < \pi$                                                 |
| $\{F_1, F_2\}$                                                                                    | Force parameters               | $\{7.5, 2.5\}$                                                                                                |
| $\lambda$                                                                                         | Damping                        | $5/6$                                                                                                         |
| $\mathbf{Q}$                                                                                      | System covariance              | $\text{diag}\{\sigma_b^2 \mathbf{1}_6, \sigma_c^2 \mathbf{1}_6\}, \sigma_b^2 = 10^{-3}, \sigma_c^2 = 10^{-5}$ |
| $\Sigma_0$                                                                                        | Initial covariance             | $1/4 \cdot \text{diag}\{1/5, 1/5, 0.0, 1/2, 1/2, 0.0, 10^{-2} \mathbf{1}_6\}$                                 |
| $\{\sigma_{min}, \sigma_{max}\}$                                                                  | Observation noise parameters   | $\{10^{-2}, 1.0\}$                                                                                            |
| $\mathbf{R}$                                                                                      | Observation covariance         | $\text{diag}\{\sigma_o^2 \mathbf{1}_3, \mathbf{0}_4\}$                                                        |
| $\varepsilon_{\text{threshold}}$                                                                  | Successful catch distance      | 0.5                                                                                                           |
| $\tau$                                                                                            | Discretization step            | 0.1                                                                                                           |
| $N$                                                                                               | Planning horizon length        | $N \leq 30$                                                                                                   |
| $\{w_0, w_1, w_2, M\}$                                                                            | Cost function weights          | $\{10^3, 10^3, 10^2, \text{diag}\{10, 1, 1, 0.1\}\}$                                                          |
